# Supplementary material for: Protein Stability Buffers the Cost of Translation Attenuation following eIF2α Phosphorylation
Source: PubMed Central journal article supplement (PMC7495045; doi:10.1016/j.celrep.2020.108154), 2020-09-15
Supplement: mmc1.pdf [file mmc1.pdf]

**Cell Reports, Volume 32**

**Supplemental Information**

**Protein Stability Buffers the Cost of  
Translation Attenuation following  
eIF2 $\alpha$  Phosphorylation**

**Kim Schneider, Geoffrey Michael Nelson, Joseph Luke Watson, Jörg Morf, Maximilian Dalglish, Laura Martina Luh, Annika Weber, and Anne Bertolotti**

## Supplemental Information

**Table S1: Top 10 GO terms of translationally regulated mRNAs as determined by anota2seq, Related to Figure 1**

Top 10 GO terms of relative translationally down- or upregulated mRNAs as determined by anota2seq at 2 and 4 hours following Tm injection.

### Translationally downregulated mRNAs at 2 hours

| Category         | GO terms                                                                                        | count | %   | p value  | adjusted p value |
|------------------|-------------------------------------------------------------------------------------------------|-------|-----|----------|------------------|
| GOTERM_BP_DIRECT | translation                                                                                     | 136   | 8.2 | 1.90E-52 | 6.60E-49         |
| GOTERM_BP_DIRECT | transport                                                                                       | 232   | 14  | 2.50E-15 | 4.50E-12         |
| GOTERM_BP_DIRECT | mitochondrial translation                                                                       | 21    | 1.3 | 1.00E-13 | 1.20E-10         |
| GOTERM_BP_DIRECT | protein transport                                                                               | 99    | 6   | 2.40E-13 | 2.20E-10         |
| GOTERM_BP_DIRECT | rRNA processing                                                                                 | 36    | 2.2 | 1.10E-11 | 8.10E-09         |
| GOTERM_BP_DIRECT | oxidation-reduction process                                                                     | 101   | 6.1 | 1.20E-10 | 7.30E-08         |
| GOTERM_BP_DIRECT | glutathione metabolic process                                                                   | 21    | 1.3 | 1.50E-10 | 7.40E-08         |
| GOTERM_BP_DIRECT | antigen processing and presentation of exogenous peptide antigen via MHC class I, TAP-dependent | 16    | 1   | 9.10E-10 | 4.00E-07         |
| GOTERM_BP_DIRECT | proton transport                                                                                | 21    | 1.3 | 4.90E-09 | 1.90E-06         |
| GOTERM_BP_DIRECT | vesicle-mediated transport                                                                      | 43    | 2.6 | 1.20E-08 | 4.20E-06         |

### Translationally downregulated mRNAs at 4 hours

| Category         | GO terms                         | count | %   | p value  | adjusted p value |
|------------------|----------------------------------|-------|-----|----------|------------------|
| GOTERM_BP_DIRECT | translation                      | 105   | 10. | 7.20E-50 | 1.80E-46         |
| GOTERM_BP_DIRECT | transport                        | 144   | 14. | 4.90E-11 | 6.10E-08         |
| GOTERM_BP_DIRECT | oxidation-reduction process      | 69    | 6.9 | 8.00E-10 | 6.60E-07         |
| GOTERM_BP_DIRECT | proton transport                 | 17    | 1.7 | 4.20E-09 | 2.60E-06         |
| GOTERM_BP_DIRECT | ATP synthesis coupled proton     | 11    | 1.1 | 2.50E-08 | 1.30E-05         |
| GOTERM_BP_DIRECT | ribosomal small subunit assembly | 10    | 1   | 1.50E-07 | 6.20E-05         |
| GOTERM_BP_DIRECT | cytoplasmic translation          | 12    | 1.2 | 1.90E-07 | 6.60E-05         |
| GOTERM_BP_DIRECT | mitochondrial translation        | 12    | 1.2 | 3.60E-07 | 1.10E-04         |
| GOTERM_BP_DIRECT | rRNA processing                  | 20    | 2   | 4.50E-06 | 1.20E-03         |
| GOTERM_BP_DIRECT | ATP metabolic process            | 11    | 1.1 | 9.20E-06 | 2.30E-03         |

### Translationally upregulated mRNAs at 2 hours

| Category         | GO terms                        | count | %   | p value  | adjusted p value |
|------------------|---------------------------------|-------|-----|----------|------------------|
| GOTERM_BP_DIRECT | mRNA processing                 | 95    | 5.1 | 3.50E-25 | 1.60E-21         |
| GOTERM_BP_DIRECT | metabolic process               | 116   | 6.2 | 6.20E-24 | 1.50E-20         |
| GOTERM_BP_DIRECT | RNA splicing                    | 70    | 3.8 | 2.40E-18 | 3.80E-15         |
| GOTERM_BP_DIRECT | protein transport               | 110   | 5.9 | 1.00E-12 | 1.20E-09         |
| GOTERM_BP_DIRECT | covalent chromatin modification | 61    | 3.3 | 4.10E-11 | 3.80E-08         |
| GOTERM_BP_DIRECT | transcription, DNA-templated    | 255   | 13. | 6.70E-11 | 5.30E-08         |
| GOTERM_BP_DIRECT | flavonoid biosynthetic process  | 15    | 0.8 | 1.80E-10 | 1.20E-07         |

|                  |                             |     |     |          |          |
|------------------|-----------------------------|-----|-----|----------|----------|
| GOTERM_BP_DIRECT | flavonoid glucuronidation   | 15  | 0.8 | 1.80E-10 | 1.20E-07 |
| GOTERM_BP_DIRECT | oxidation-reduction process | 113 | 6.1 | 4.30E-10 | 2.50E-07 |
| GOTERM_BP_DIRECT | DNA repair                  | 65  | 3.5 | 1.40E-09 | 7.40E-07 |

#### Translationally upregulated mRNAs at 4 hours

| Category         | GO terms                                                                         | count | %   | p value  | <b>adjusted p value</b> |
|------------------|----------------------------------------------------------------------------------|-------|-----|----------|-------------------------|
| GOTERM_BP_DIRECT | flavonoid glucuronidation                                                        | 12    | 1.8 | 6.20E-12 | 1.40E-08                |
| GOTERM_BP_DIRECT | flavonoid biosynthetic process                                                   | 12    | 1.8 | 6.20E-12 | 1.40E-08                |
| GOTERM_BP_DIRECT | xenobiotic glucuronidation                                                       | 9     | 1.4 | 7.20E-12 | 8.20E-09                |
| GOTERM_BP_DIRECT | metabolic process                                                                | 38    | 5.7 | 1.50E-07 | 1.20E-04                |
| GOTERM_BP_DIRECT | transcription, DNA-templated                                                     | 93    | 14  | 6.90E-06 | 3.90E-03                |
| GOTERM_BP_DIRECT | mRNA processing                                                                  | 25    | 3.8 | 7.20E-05 | 3.20E-02                |
| GOTERM_BP_DIRECT | protein ubiquitination involved in ubiquitin-dependent protein catabolic process | 15    | 2.3 | 7.30E-05 | 2.80E-02                |
| GOTERM_BP_DIRECT | regulation of transcription, DNA-                                                | 103   | 15. | 7.40E-05 | 2.40E-02                |
| GOTERM_BP_DIRECT | response to nutrient                                                             | 10    | 1.5 | 4.10E-04 | 1.10E-01                |
| GOTERM_BP_DIRECT | protein ubiquitination                                                           | 25    | 3.8 | 4.20E-04 | 1.00E-01                |

**Table S2: Oligonucleotides used in this study**

|                                           |               |     |
|-------------------------------------------|---------------|-----|
| <i>MmPpp1r15a_R</i> : tctcaggtcctccttctca | Sigma-Aldrich | N/A |
| <i>MmChop_F</i> : cctagcttgctgacagagg     | Sigma-Aldrich | N/A |
| <i>MmChop_R</i> : ctgctccttctcctcatgc     | Sigma-Aldrich | N/A |
| <i>MmBiP_F</i> : ctttgatcagcgggtcatgg     | Sigma-Aldrich | N/A |
| <i>MmBiP_R</i> : agctctcaaattggcccg       | Sigma-Aldrich | N/A |
| <i>MmGrp94_F</i> : agtcggaagcaacagagaa    | Sigma-Aldrich | N/A |
| <i>MmGrp94_R</i> : tctccatgtgccagaccat    | Sigma-Aldrich | N/A |
| <i>MmNedd4_F</i> : atgtggatgctgggagttga   | Sigma-Aldrich | N/A |
| <i>MmNedd4_R</i> : ctgcacgctggaaggattc    | Sigma-Aldrich | N/A |
| <i>MmRps6_F</i> : aaggaagaagcccaggacc     | Sigma-Aldrich | N/A |
| <i>MmRps6_R</i> : ctgttcctggcgcttttctt    | Sigma-Aldrich | N/A |
| <i>MmCul4b_F</i> : ccctgtcttcttgacac      | Sigma-Aldrich | N/A |
| <i>MmCul4b_R</i> : aggaagcaaagcagagtctt   | Sigma-Aldrich | N/A |
| <i>MmAsns_F</i> : aggagcatcgagaaaacca     | Sigma-Aldrich | N/A |
| <i>MmAsns_R</i> : aagaagggagtggtggagtg    | Sigma-Aldrich | N/A |
| <i>HsRpl4_F</i> : tgggacgtttctgcatttgg    | Sigma-Aldrich | N/A |
| <i>HsRpl4_R</i> : cgatggatcttctgcgtgg     | Sigma-Aldrich | N/A |
| <i>HsMrpl12_F</i> : ggaggcggtggaagaagata  | Sigma-Aldrich | N/A |
| <i>HsMrpl12_R</i> : gactccaccagcttctttgc  | Sigma-Aldrich | N/A |
| <i>HsMrpl28_F</i> : ggacctgtgctccaagttg   | Sigma-Aldrich | N/A |
| <i>HsMrpl28_R</i> : ttgaacaggggtacagggtc  | Sigma-Aldrich | N/A |
| <i>HsMrps15_F</i> : ggccaacaagaaggagatgc  | Sigma-Aldrich | N/A |
| <i>HsMrps15_R</i> : ttgtgggctttgtcctttcg  | Sigma-Aldrich | N/A |
| <i>HsMrps25_F</i> : caggaagaggaggaggaga   | Sigma-Aldrich | N/A |
| <i>HsMrps25_R</i> : aacccttgggtgcagatcat  | Sigma-Aldrich | N/A |
| <i>MmMrpl12_F</i> : tcctcctccttccctgag    | Sigma-Aldrich | N/A |
| <i>MmMrpl12_R</i> : cctccaaggctgctttgatc  | Sigma-Aldrich | N/A |
| <i>MmMrpl28_F</i> : ccccgggtactacaaacct   | Sigma-Aldrich | N/A |
| <i>MmMrpl28_R</i> : tccacaccttctcacctc    | Sigma-Aldrich | N/A |
| <i>MmMrps15_F</i> : caagcaggacgatgaaccac  | Sigma-Aldrich | N/A |
| <i>MmMrps15_R</i> : attgcgatcctgacagtca   | Sigma-Aldrich | N/A |
| <i>MmMrps25_F</i> : cccttctgcggttctatct   | Sigma-Aldrich | N/A |

|                                                                                                       |               |     |
|-------------------------------------------------------------------------------------------------------|---------------|-----|
| MmMrps25_R: ggcttctactctgcacatg                                                                       | Sigma-Aldrich | N/A |
| <i>Cyclophilin B</i> _F: ggagatggcacaggaggaa                                                          | Sigma-Aldrich | N/A |
| <i>Cyclophilin B</i> _R: gcccgtagtgcttcagctt                                                          | Sigma-Aldrich | N/A |
| <i>Luciferase</i> _F: aaaggatatcaggtggcccc                                                            | Sigma-Aldrich | N/A |
| <i>Luciferase</i> _R: ccacaaacacaactcctccg                                                            | Sigma-Aldrich | N/A |
| <i>Atp5d</i> _5UTR_F:<br>gatacaactagtccttcggagaatcctgtgc                                              | Sigma-Aldrich | N/A |
| <i>Atp5d</i> _5UTR_R:<br>gatacacatggggtggcggaaaagtcagtg                                               | Sigma-Aldrich | N/A |
| <i>Atf4</i> _5UTR_F:<br>gatacaactagtggttaggtgtcccaccc                                                 | Sigma-Aldrich | N/A |
| <i>Atf4</i> _5UTR_R:<br>gatacagaattcgtgtggggcttggctggattcg                                            | Sigma-Aldrich | N/A |
| <i>Mrps28</i> _5UTR_F:<br>gatacagaattcagggaagctttaactaccggac                                          | Sigma-Aldrich | N/A |
| <i>Mrps28</i> _5UTR_R:<br>gatacacatgggacgcctgcgcgacctc                                                | Sigma-Aldrich | N/A |
| <i>Mrps33</i> _5UTR_F:<br>gatacaactagtccgggtgtccgcccac                                                | Sigma-Aldrich | N/A |
| <i>Mrps33</i> _5UTR_R:<br>gatacacatggttcttcaccagtagggaacaggattcc                                      | Sigma-Aldrich | N/A |
| <i>Rps15a</i> _5UTR_F:<br>gatacaactagtataattccgtgcttggcccggcccactctc<br>tttctgccatcttccctcgcccacc     | Sigma-Aldrich | N/A |
| <i>Rps15a</i> _5UTR_R:<br>gatacacatggggtggcggcgaggggaagatggcagaa<br>agagagtgggcccgggcaaacgcacggaattat | Sigma-Aldrich | N/A |
| <i>Rps18</i> _5UTR_F:<br>gatacaactagtgctacttccgctctcttccacaggaggcc<br>tacacgccgcccgtctgtgccgcccgc     | Sigma-Aldrich | N/A |
| <i>Rps18</i> _5UTR_R:<br>gatacacatggggcggcgccacagacggcggcgtgtag<br>gcctcctgtggaagagagagcggaagtgc      | Sigma-Aldrich | N/A |
| <i>Rpl35</i> _5UTR_F:<br>ggactagtgaacagtggaagaagagaactc                                               | Sigma-Aldrich | N/A |
| <i>Rpl35</i> _5UTR_R:<br>catgccatgggtcggcggtgttcacg                                                   | Sigma-Aldrich | N/A |
| <i>Rps24</i> _5UTR_F:<br>ggactagtgtggggtccttctt                                                       | Sigma-Aldrich | N/A |
| <i>Rps24</i> _5UTR_R:<br>catgccatgggatggctacggcgcc                                                    | Sigma-Aldrich | N/A |
| <i>Rps15</i> _5UTR_F:<br>gatacaactagtgacttcttccgagtaaccgccaag                                         | Sigma-Aldrich | N/A |
| <i>Rps15</i> _5UTR_R:<br>gatacacatggcttggcgttactcggaaaaggaagtac                                       | Sigma-Aldrich | N/A |

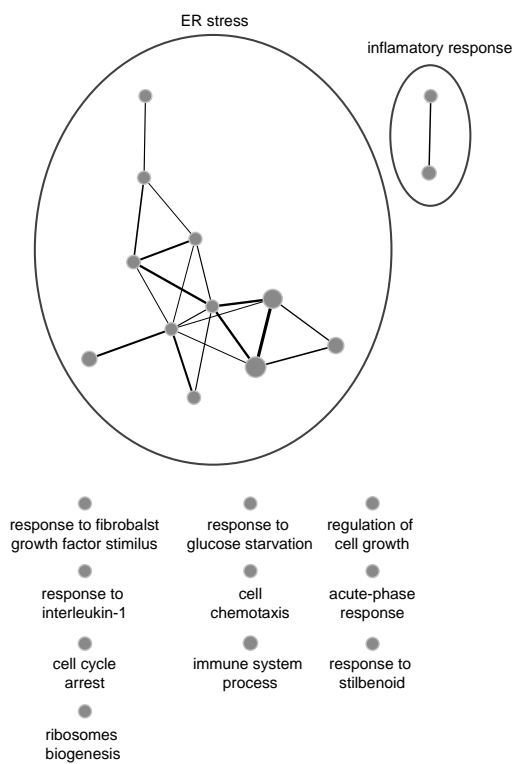

**Figure S1. Gene ontology enrichment map of mRNAs transcriptionally upregulated after Tm, Related to Figure 1**  
 Significant ( $P < 0.001$ ) gene ontology enrichment maps of the 900 mRNAs transcriptionally upregulated (2-fold cut-off) 4 hours after Tm injection.

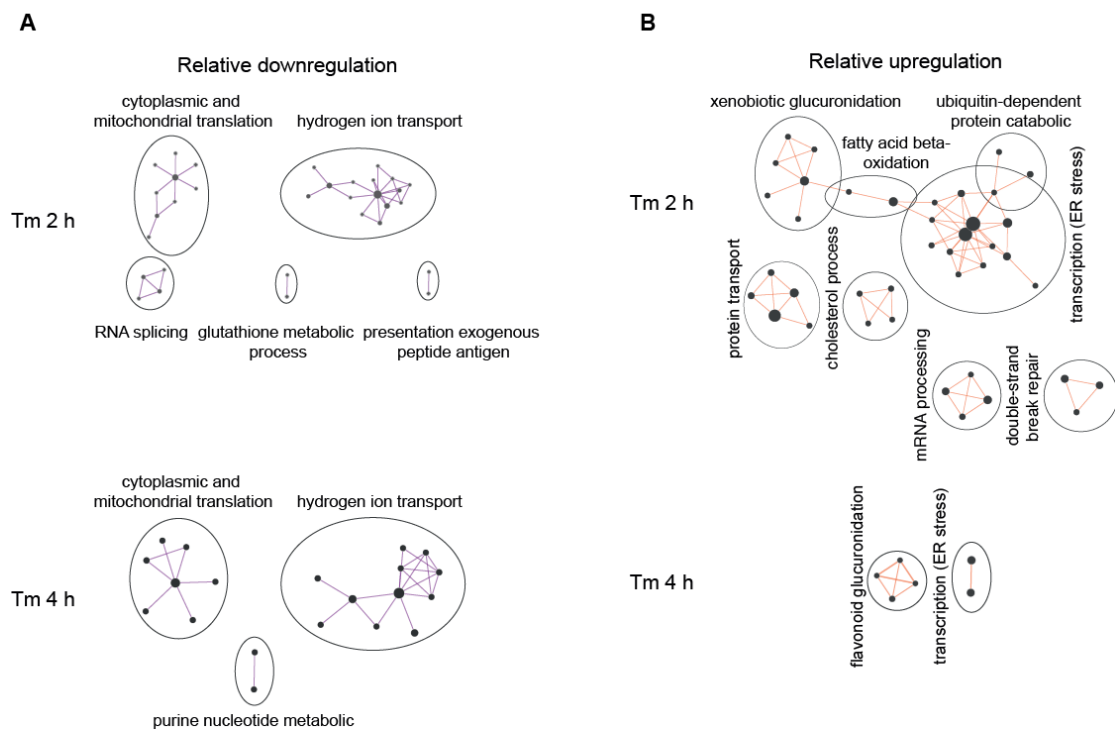

**Figure S2. GO analysis of mRNA translationally affected following Tm, Related to Figure 3**

(A) Significant ( $P < 0.001$ ) GO enrichment maps of translationally downregulated mRNAs as determined by anota2seq at 2 and 4 hours following Tm injection.

(B) Same as (A) for genes resistant to translational attenuation (relative upregulation).

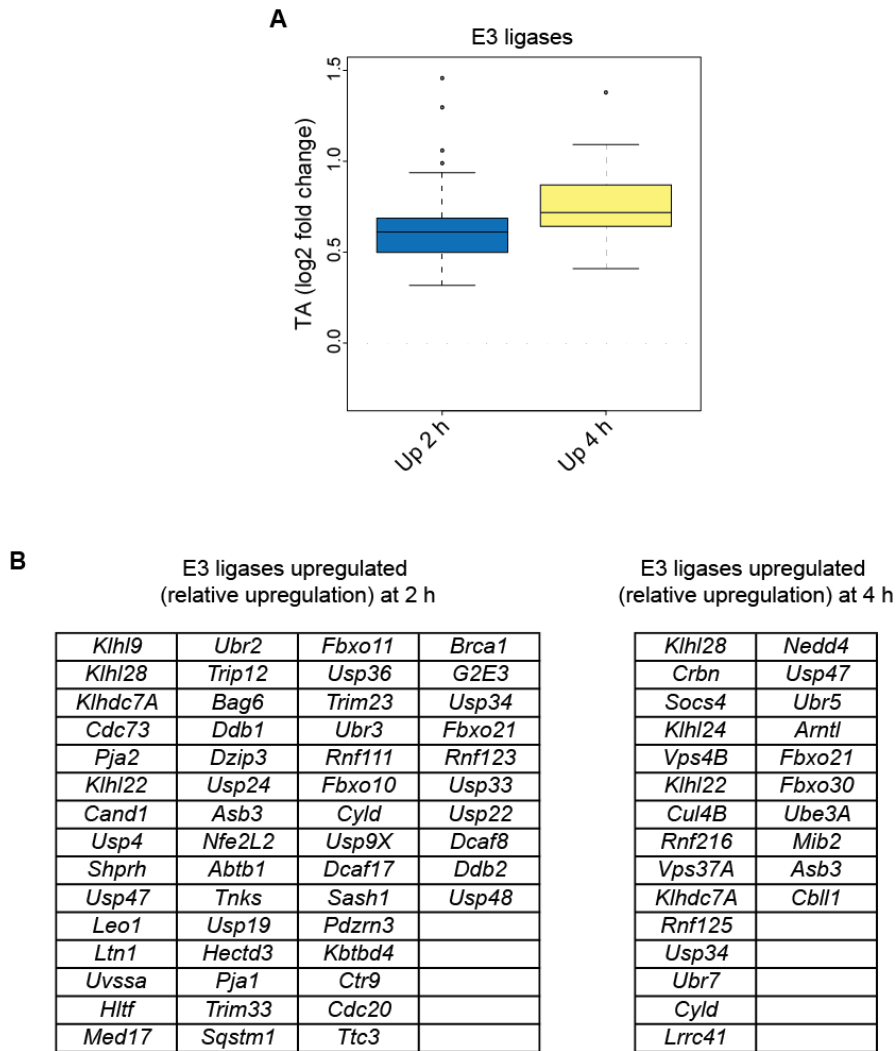

**Figure S3. Relative translational regulation of E3 ligases following Tm, Related to Figure 3**

(A) Boxplot showing the median translation efficiency (TA) as determined by anota2seq at 2 and 4 hours following Tm treatment.

(B) List of E3 ligases translationally upregulated (relative upregulation) at 2 and 4 hours following Tm, respectively.



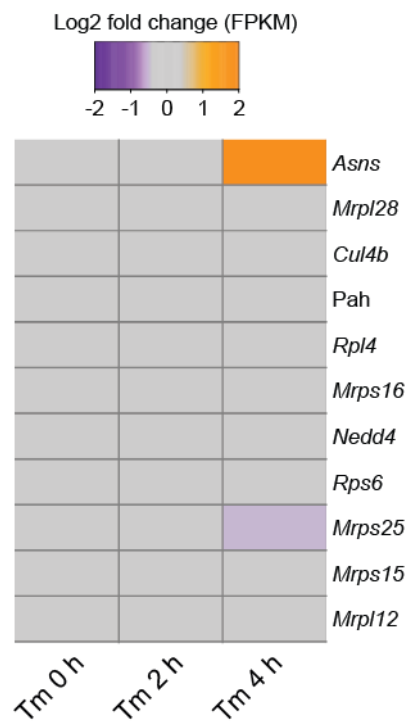

**Figure S4. mRNAs abundance of selected transcripts, Related to Figure 3**  
 Log2 FPKM values for indicated genes at 0, 2 and 4 hours following Tm.

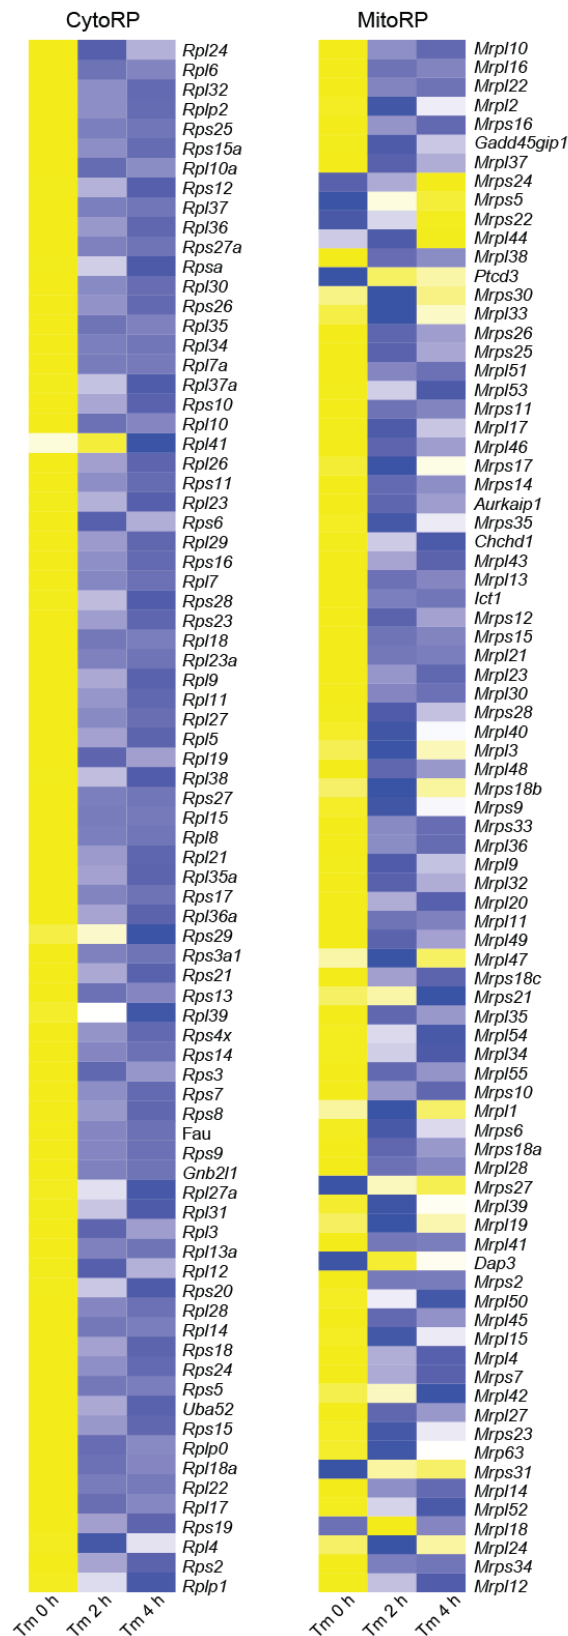

**Figure S5. Cytosolic and mitochondrial ribosomal proteins are translationally downregulated by Tm, Related to Figure 3**

(A) Heat map showing z-scores of anota2seq translation efficiencies of all 79 cytosolic ribosomal proteins (CytoRP) subunit-encoding mRNAs at 0, 2 and 4 hours following Tm injection.

(B) Same as (A) but with all 82 mitochondrial ribosomal proteins (MitoRP) subunits.

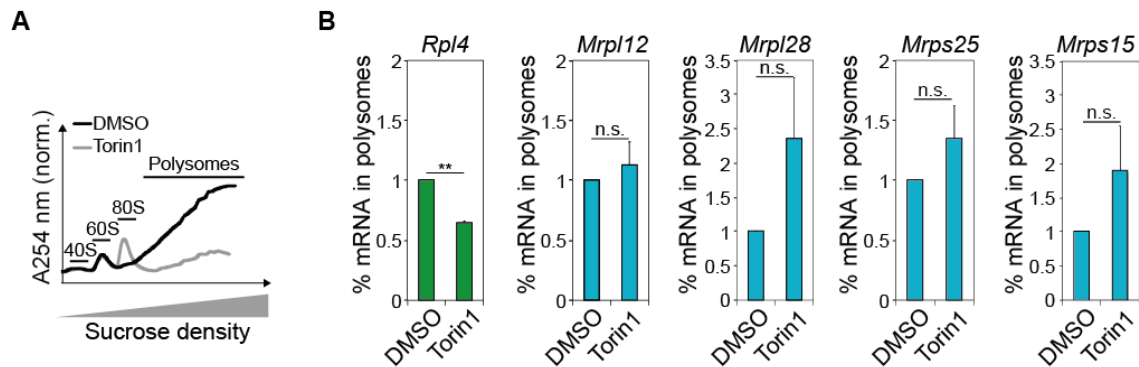

**Figure S6. Translation of mitochondrial ribosomal proteins is not sensitive to acute mTORC1 inhibition, Related to Figure 4**

(A) Representative polysome profile (optical density of the fractions at 254 nm) on 5-50% sucrose gradients of HeLa cells treated with DMSO or 250 nM of Torin1 for 2 hours.

(B) *Rpl4*, *Mrpl12*, *Mrpl28*, *Mrps25* and *Mrps15* mRNA abundance from heavy polysomal fractions (more than 3 ribosomes) from (A) assessed by qPCR.

Data are means  $\pm$  SEM ( $n = 5-9$ ). \*\* $P < 0.01$  as determined by the unpaired Student t-test.

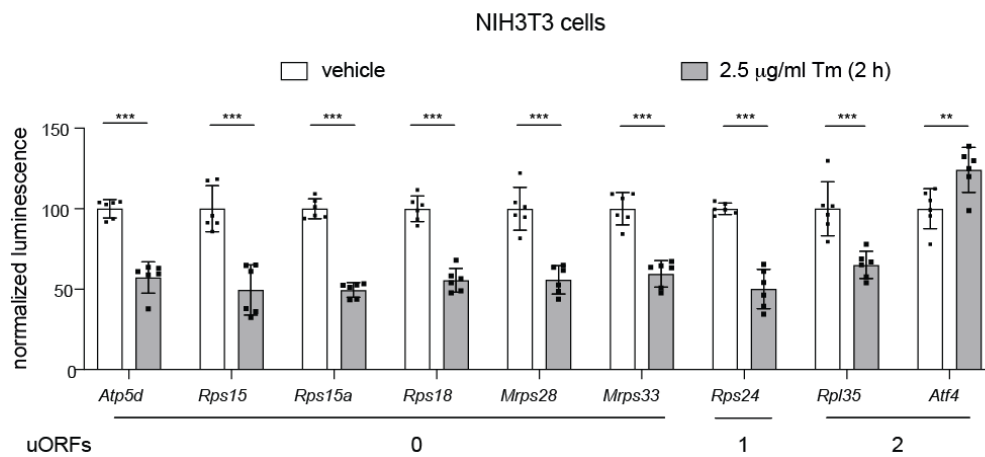

**Figure S7. Composition of UTRs regulates the translational response to eIF2 $\alpha$  phosphorylation, Related to Figure 5**

Firefly luciferase activity in NIH3T3 cells transfected with reporter mRNAs containing the 5'UTRs of indicated mRNAs and treated with either vehicle or 2.5  $\mu$ g/ml Tunicamycin (Tm) for 2 hours. Firefly luciferase activity was normalized against a transfection control (see Methods) and vehicle-treated cells. Data are means  $\pm$  SEM (n=6). Statistical analysis was carried out in Prism 8 using a two-way ANOVA test.

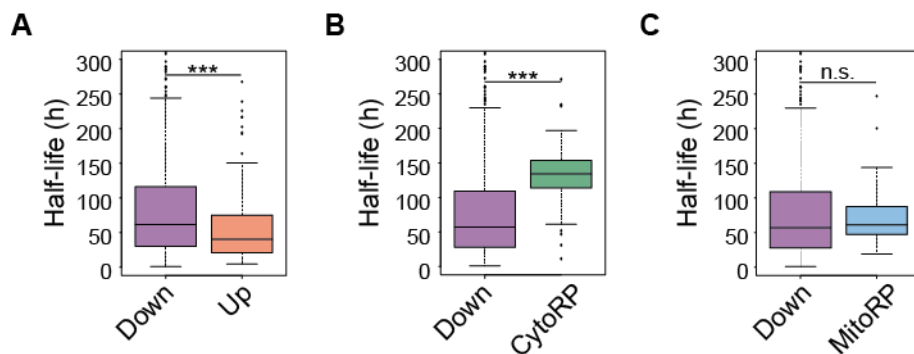

**Figure S8. Translationally downregulated mRNAs encode for highly stable proteins, Related to Figure 6**

Same as in Figure 6E with protein half-lives analyzed from (Schwanhäusser et al, 2013).

(A) Boxplot of half-lives of proteins encoded by down- or upregulated (Down or Up) mRNAs at 2 hours following Tm injection.

(B) Same as (A) comparing the half-lives of proteins encoded by translationally downregulated mRNAs with all 79 CytoRP subunits 2 hours after Tm.

(C) Same as (B) with all 82 MitoRP subunits. (A-C) \*\*\*P<0.001 as determined by the unpaired Wilcoxon test.

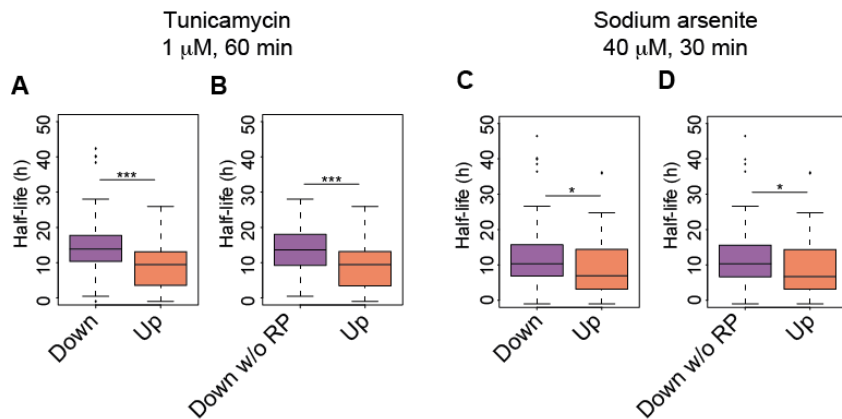

**Figure S9. eIF2 $\alpha$  phosphorylation induced by different stressors downregulates translation of mRNAs encoding for stable proteins, Related to Figure 6**

(A) Boxplot of half-lives of proteins encoded by the translationally down or upregulated (Down or Up) mRNAs using data from (Sidrauski et al, 2015) 1 hours following Tm treatment of HEK293T cells.

(B) Same as (A) but excluding the RPs from the category of translationally downregulated mRNAs (Down w/o RP).

(C) Same as (A) but with data from (Andreev et al, 2015) acquired 30 minutes following arsenite treatment of HEK293T cells.

(D) Same as (C) but excluding the RPs from the category of translationally downregulated mRNAs (Down w/o RP).

(A-D) Protein half-lives were analyzed from (Ly et al, 2018)

\*P<0.05, \*\*\*P<0.001 as determined by the unpaired Wilcoxon test.
